# Supplementary material for: The effects of chronic unpredicted mild stress on maternal negative emotions and gut microbiota and metabolites in pregnant rats
Source: PeerJ. 2023 Apr 17;11:e15113. doi: 10.7717/peerj.15113 (PMC10117386; doi:10.7717/peerj.15113)
Supplement: Supplemental Information 1 [file peerj-11-15113-s001.xls]

## Sheet: exp_diff_detail_20220731_153752
Metabolite	Metab ID	Formula	KEGG Pathway Description	VIP_pred_OPLS-DA	VIP_PLS-DA	FC(MSZ/DSZ)	P_value	FDR	MS1	MS2	MS3	MS4	MS5	MS6	DS1	DS2	DS3	DS4	DS5	DS6	Fragmentation Score	Theoretical Fragmentation Score	Score	KEGG Pathway ID	Retention time	cas_id	KEGG Pathway Description	HMDB Subclass	KEGG Pathway Second Category	KEGG Pathway First Category	KEGG Compound First Category	Library ID	subclass	mode	formula	Quant Mass	KEGG Compound Second Category	HMDB Superclass	KEGG Compound ID
trigonelline	metab_10	C7H7NO2		4.06664	3.99629	0.882298	3.117e-09	6.764e-07	4.8095	4.6742	4.7161	4.7579	4.7378	4.7727	5.2955	5.3417	5.4	5.3309	5.4395	5.4608				map00760	7.236	535-83-1	Nicotinate and nicotinamide metabolism	-	Metabolism of cofactors and vitamins	Metabolism	-	HMDB0000875	-	pos	C7H7NO2	206.1	-	Alkaloids and derivatives	C01004
4-hydroxybenzyl cyanide	metab_48	-		2.44767	1.97601	1.04609	0.02477	0.9948	5.0921	5.1795	4.9888	5.3331	5.146	5.5788	5.0148	5.0265	4.9255	5.0137	5.0136	4.9447				-	13.793	-	-	-	-	-	-	-	-	pos	-	205.1	-	-	C03766
Phenylalanine	metab_53	-		1.42965	1.31545	0.980082	0.04972	0.9948	6.0844	5.9168	5.9458	5.9866	6.1432	5.943	6.0241	6.0868	6.2336	6.0206	6.2432	6.1427				map01100;map04978;map01110;map00970;map00460;map00960;map02010;map01230;map00966;map01210;map00940;map01070;map00360;map04974;map01130;map00400;map01064;map01063;map05230;map01061;map01060	14.214	150-30-1	Metabolic pathways;Mineral absorption;Biosynthesis of secondary metabolites;Aminoacyl-tRNA biosynthesis;Cyanoamino acid metabolism;Tropane, piperidine and pyridine alkaloid biosynthesis;ABC transporters;Biosynthesis of amino acids;Glucosinolate biosynthesis;2-Oxocarboxylic acid metabolism;Phenylpropanoid biosynthesis;Biosynthesis of plant hormones;Phenylalanine metabolism;Protein digestion and ab…	-	Global and overview maps;Digestive system;Global and overview maps;Translation;Metabolism of other amino acids;Biosynthesis of other secondary metabolites;Membrane transport;Global and overview maps;Biosynthesis of other secondary metabolites;Global and overview maps;Biosynthesis of other secondary metabolites;Chemical structure transformation maps;Amino acid metabolism;Digestive system;Global an…	Metabolism;Organismal Systems;Metabolism;Genetic Information Processing;Metabolism;Metabolism;Environmental Information Processing;Metabolism;Metabolism;Metabolism;Metabolism;Metabolism;Metabolism;Organismal Systems;Metabolism;Metabolism;Metabolism;Metabolism;Human Diseases;Metabolism;Metabolism	Peptides;-	-	-	pos	-	120.1	Amino acids;-	-	C00079;C02057
3,4-dihydroxymandelic acid	metab_68	C8H8O5		2.35757	2.26561	0.929075	0.009744	0.9432	3.9866	4.1522	3.5668	3.9703	3.9947	4.0664	4.1682	4.179	4.2096	4.4642	4.2133	4.3111				map01100;map00350	15.799	775-01-9	Metabolic pathways;Tyrosine metabolism	Phenols	Global and overview maps;Amino acid metabolism	Metabolism;Metabolism	-	HMDB0001866	Benzenediols	pos	C8H8O5	355.3	-	Benzenoids	C05580
2,3-diphosphoglycerate	metab_81	-		1.89357	1.56356	1.03908	0.04211	0.9948	4.5848	4.5553	4.5246	4.6369	4.7127	4.5829	4.4756	4.6734	4.4066	4.5247	4.2328	4.2511				map01100;map00010	16.968	-	Metabolic pathways;Glycolysis / Gluconeogenesis	-	Global and overview maps;Carbohydrate metabolism	Metabolism;Metabolism	-	-	-	pos	-	299.2	-	-	C01159
pantothenic acid	metab_127	C9H17NO5		1.52778	1.62552	1.03303	0.03359	0.9948	5.7316	5.541	5.6902	5.6133	5.8402	5.3617	5.4721	5.5468	5.4485	5.3626	5.476	5.3949				map01100;map01110;map00770;map00410;map04977	20.28	79-83-4	Metabolic pathways;Biosynthesis of secondary metabolites;Pantothenate and CoA biosynthesis;beta-Alanine metabolism;Vitamin digestion and absorption	Alcohols and polyols	Global and overview maps;Global and overview maps;Metabolism of cofactors and vitamins;Metabolism of other amino acids;Digestive system	Metabolism;Metabolism;Metabolism;Metabolism;Organismal Systems	Vitamins and Cofactors	HMDB0000210	Polyols	pos	C9H17NO5	291.2	Vitamins	Organooxygen compounds	C00864
3-hydroxypyridine	metab_190	-		1.77559	1.50601	1.02993	0.01304	0.9432	4.6271	4.7599	4.7962	4.7658	4.604	4.7343	4.6627	4.6455	4.5686	4.6132	4.5129	4.4657				-	26.039	-	-	-	-	-	-	-	-	pos	-	362.2	-	-	-
