# Supplementary material for: The effects of chronic unpredicted mild stress on maternal negative emotions and gut microbiota and metabolites in pregnant rats
Source: PeerJ. 2023 Apr 17;11:e15113. doi: 10.7717/peerj.15113 (PMC10117386; doi:10.7717/peerj.15113)
Supplement: Supplemental Information 2 [file peerj-11-15113-s002.xlsx]

## Sheet: Sheet1
group	plasma corticosterone levels of pregnant rat
stress model	59.1	72.5	114	168	95.35
stress model	74.95	85.6	92.9	170.5	123.6
stress model	73.35	84.9	171.95	156	201.05
stress model	129.6	109.9	158.35	180.25	97.7
stress model	68.7	109.15	124.1	132.55	124.95
control	62.3	59.65	79.35	116.2	101
control	92.7	46.35	91.95	112.85	78.45
control	114.5	150.05	102.35	88.85	101.55
control	68	104.5	85.35	117.95	119.2
control	64.7	119	116.2	91.55	80.4
group	vertical movement scores at different times
stress model	12	4	7	4	5
stress model	2	5	15	5	4
stress model	10	10	10	7	7
stress model	13	13	8	8	7
stress model	12	10	16	3	5
stress model	13	15	9	3	3
control	14	7	4	5	18
control	23	9	16	7	11
control	18	8	7	12	14
control	4	18	8	8	12
control	14	6	12	9	8
group	horizontal movement scores at different times
stress model	66	46	28	29	34
stress model	62	58	50	36	40
stress model	65	71	60	27	60
stress model	79	63	69	50	51
control	60	69	55	57	67
control	65	100	62	60	92
control	93	70	80	97	75
control	59	49	55	64	73
group	pure water consumption
stress model	4	7	3	7	7
stress model	7	10	2	8	6
stress model	7	3	6	9	9
stress model	9	3	5	6	9
stress model	6	12	8	8	7
stress model	4	5	3	9	8
stress model	3	6	4	8	8
stress model	3	10	3	8	8
stress model	7	3	3	6	8
control	10	4	4	5	7
control	3	5	4	4	5
control	3	3	5	5	4
control	3	3	4	5	4
group	sugar water consumption
stress model	4	4	3	6	5
stress model	5	6	4.5	5	5
stress model	7	6	4	3	6
stress model	6	5	6	4	7
stress model	5	8	7	4	8
stress model	4	5	4	6	7
stress model	9	6	5	5	7
stress model	7	3	3	4	7
stress model	5	4	5	6	5
control	5	6	5	10	8
control	5.5	6	8	7	9
control	6	5.5	7	7	10
control	5	4.5	5	8	9
group	total liquid consumption
stress model	8	11	6	13	12
stress model	12	16	7	13	11
stress model	14	9	10	12	15
stress model	15	8	11	10	16
stress model	11	20	15	12	15
stress model	8	10	7	15	15
stress model	12	12	9	13	15
stress model	10	13	6	12	15
stress model	12	7	8	12	13
control	15	10	9	15	15
control	8.5	11	12	11	14
control	9	8.5	12	12	14
control	8	7.5	9	13	13
group	1% sucrose preference percentage of pregnant rats
stress model	0.5	0.36	0.5	0.46	0.42
stress model	0.42	0.38	0.69	0.38	0.45
stress model	0.5	0.67	0.4	0.25	0.4
stress model	0.4	0.63	0.52	0.4	0.44
stress model	0.45	0.4	0.47	0.33	0.53
stress model	0.5	0.5	0.57	0.4	0.47
stress model	0.75	0.5	0.56	0.38	0.47
stress model	0.7	0.23	0.5	0.33	0.47
stress model	0.42	0.57	0.63	0.5	0.38
control	0.33	0.6	0.56	0.67	0.53
control	0.65	0.55	0.67	0.64	0.64
control	0.67	0.65	0.58	0.58	0.71
control	0.63	0.6	0.56	0.62	0.69
