# Supplementary material for: The effects of chronic unpredicted mild stress on maternal negative emotions and gut microbiota and metabolites in pregnant rats
Source: PeerJ. 2023 Apr 17;11:e15113. doi: 10.7717/peerj.15113 (PMC10117386; doi:10.7717/peerj.15113)
Supplement: Supplemental Information 4 [file peerj-11-15113-s004.xlsx]

## Sheet: Sheet1
group	Sobs	shannon	simpson	ace	chao	coverage
stress model	468	3.8915	0.069	529.926	539.143	0.997449
stress model	475	4.1359	0.0501	550.01	532.306	0.997904
stress model	450	3.7279	0.0716	499.478	525.115	0.997175
control	503	4.434	0.0307	566.405	576.978	0.997479
control	526	4.4987	0.0262	604.47	615.417	0.997175
control	492	4.3274	0.0291	576.132	575.021	0.997115
